# Supplementary material
Source: Springer Nature journal article supplement (https://www.springermedizin.de/resource/supplementary/12943_2012_1039_MOESM3_ESM.pdf/9552134)

(A)

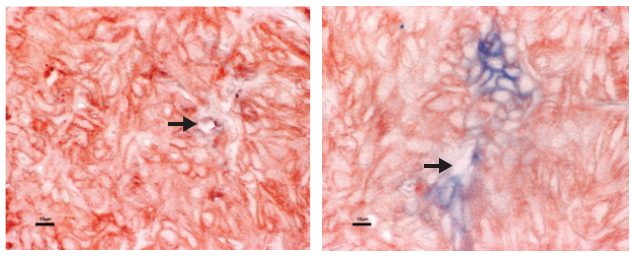

0 μg/mouse, 24 hours

20 μg/mouse, 24 hours

**Image Legend**  
 Red = EGFR staining  
 Light Blue = Panitumumab  
 Dark Blue = Anti-Idiotypic Ab

A431 tumor cell from control mouse

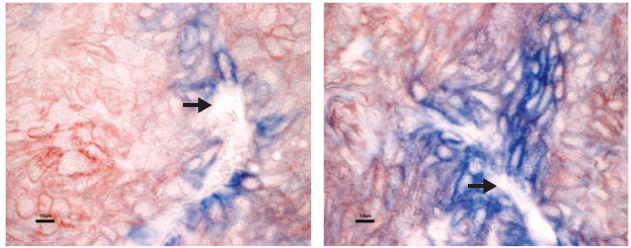

200 μg/mouse, 24 hours

500 μg/mouse, 24 hours

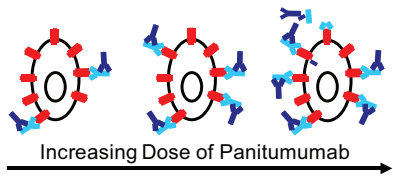

(B)

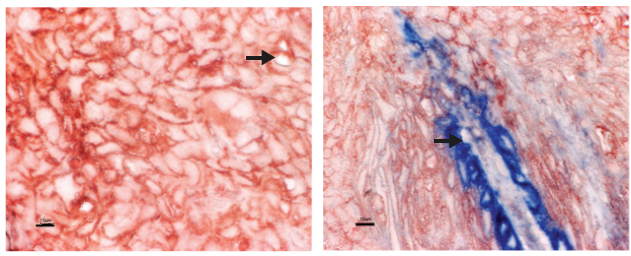

0 μg/mouse, 96 hours

20 μg/mouse, 96 hours

**Image Legend**  
 Red = EGFR staining  
 Light Blue = Panitumumab  
 Dark Blue = Anti-Idiotypic Ab

A431 tumor cell from control mouse

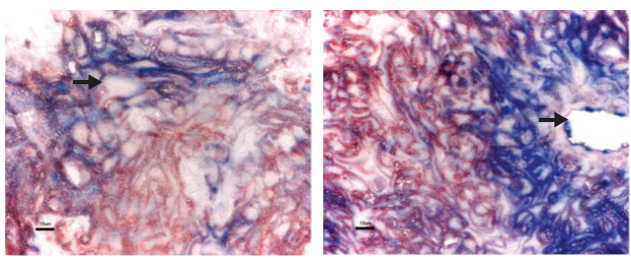

200 μg/mouse, 96 hours

500 μg/mouse, 96 hours

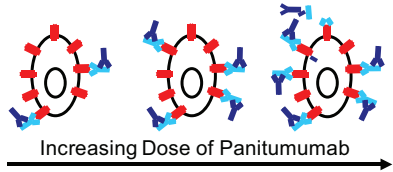

(C)

IHC Staining Intensity for Anti-Idiotypic Antibody in A431 Xenografts

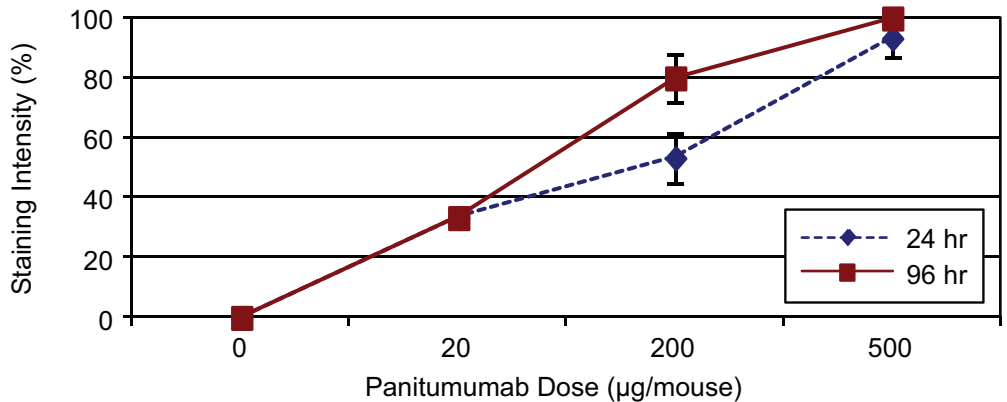

Supplement: MOESM3 [file 9552134]
